# Supplementary material
Source: PubMed Central journal article supplement (PMC2938104)
Supplement: supp_M110.000075_mcp.M110.000075-1.pdf [file supp_M110.000075_mcp.M110.000075-1.pdf]

**Figure S1**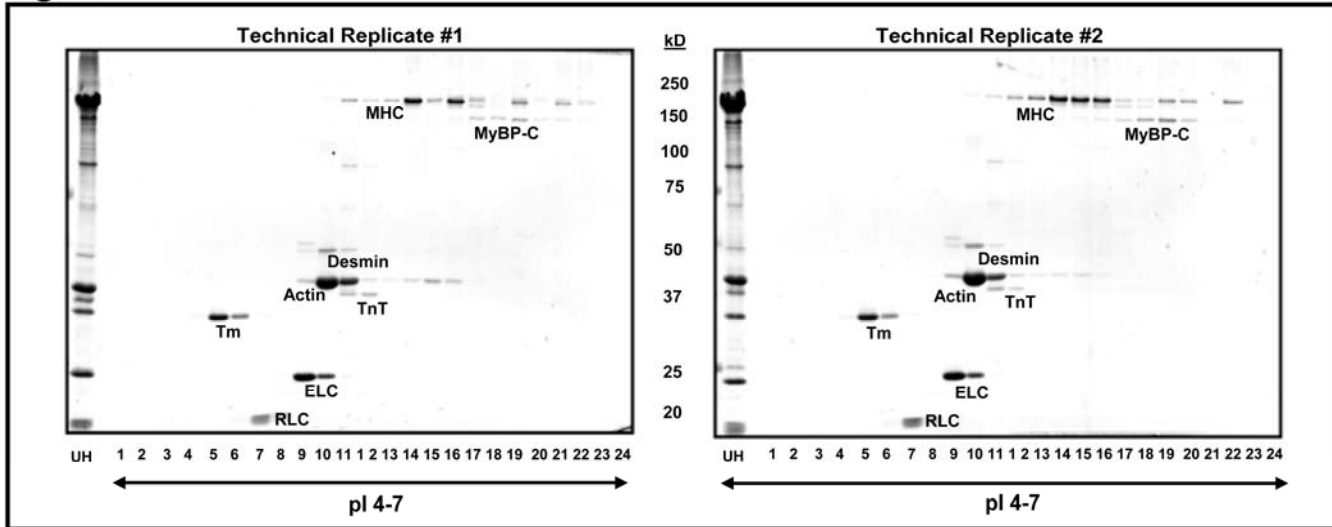

**Figure S1: Technical replicates of OGE demonstrating the reproducibility of separation.** Myofibrils extracted from the same mouse heart (4.0 mg) were divided into 2 samples (2 mg each), and technical replicate runs were performed using OGE over a narrow pH range 4-7, 24 cm separating distance. OGE fractions (2  $\mu$ l) were run on 12% SDS-PAGE gels and stained with Coomassie G250.
